# Supplementary material for: Trifloxystrobin blocks the growth of Theileria parasites and is a promising drug to treat Buparvaquone resistance
Source: PubMed Central journal article supplement (PMC9666453; doi:10.1038/s42003-022-03981-x), 2022-11-15
Supplement: 42003_2022_3981_MOESM3_ESM.pdf [file 42003_2022_3981_MOESM3_ESM.pdf]

## Description of Additional Supplementary Files

**File name:** Supplementary Data 1

**Description:** The source data behind the graphs and plots in the paper
